# Supplementary material
Source: Springer Nature journal article supplement (https://www.springermedizin.de/resource/supplementary/12883_2014_1046_MOESM2_ESM.pdf/9456426)

**A**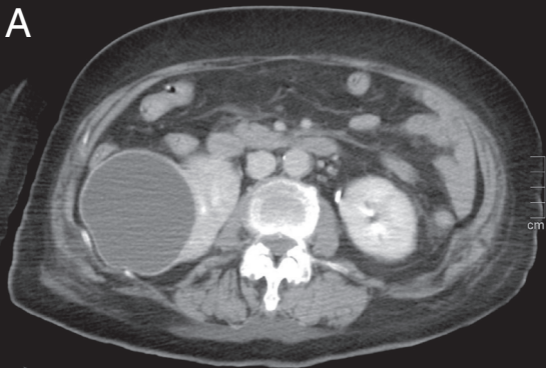**B**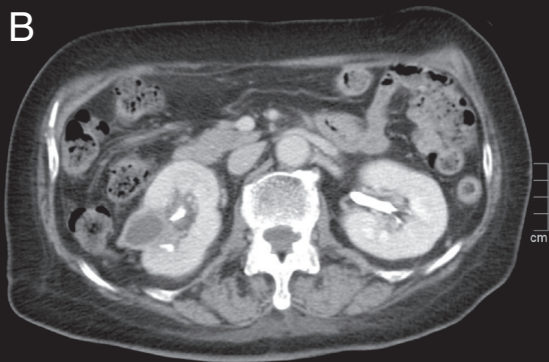

Supplement: MOESM2 [file 9456426]
